# Supplementary material for: Monitoring of measurable residual disease and chimerism in patients with JAK2 V617F-positive myelofibrosis after allogeneic hematopoietic cell transplantation
Source: Research Square preprint supplement (doi:10.21203/rs.3.rs-2654645/v1), 2023-03-20
Supplement: Supplementary file 1 [file 275d1c84861aad35677c07ad.docx]

Supplementary table 1. AUC values calculated by time-dependent ROC analysis

| Variable | Measured time | AUC at D300 | AUC at D500 |
| --- | --- | --- | --- |
| *JAK2*-MRD VAF | D30 | 0.404 | 0.309 |
| D100 | 0.918 | 0.787 |
| D180 | 0.955 | 0.750 |
| D360 | - | 0.753 |
| *JAK2*-MRD ratio | D100 | 1.000 | 0.986 |
| D180 | 0.743 | 0.565 |
| D360 | - | 0.680 |
| NGS chimerism | D30 | 0.447 | 0.442 |
| D100 | 0.692 | 0.583 |
| D180 | 0.932 | 0.834 |
| D360 | - | 0.655 |
| STR chimerism | D30 | 0.301 | 0.429 |
| D100 | 0.508 | 0.439 |
| D180 | 0.926 | 0.728 |
| D360 | - | 0.691 |

Abbreviations: AUC, Area Under the ROC Curve; ROC, Receiver Operating Characteristic; MRD, measurable residual disease; VAF, Variant allele frequency; NGS, Next-generation sequencing; STR, Short Tandem Repeat; D, day.


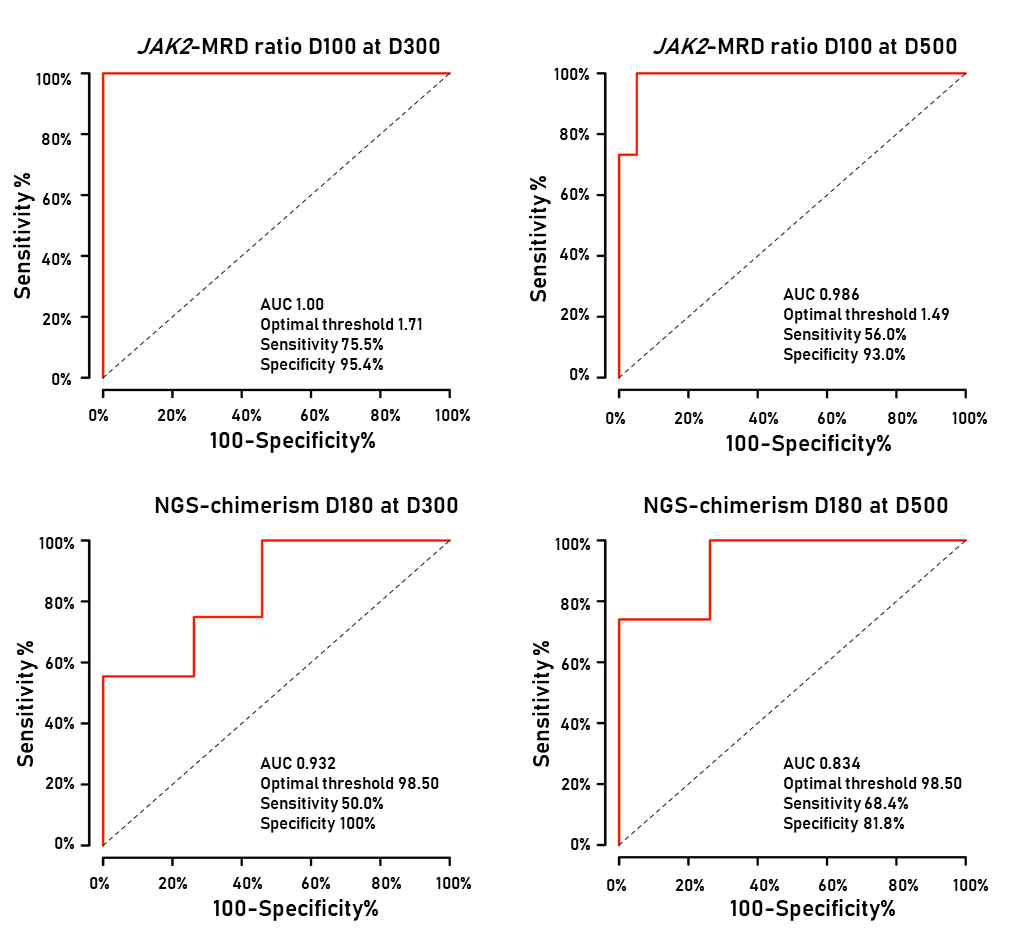


Supplementary Figure 1. Time-dependent ROC curves of the overt relapse prediction markers. (A) *JAK2*-MRD ratio at D100 for overt relpase prediction at D300 and (B) D500. (C) NGS chimerism at D180 for overt relapse prediction at D300 and (D) D500.

Abbreviations: AUC, Area Under the ROC Curve; ROC, Receiver Operating Characteristic; MRD, measurable residual disease; D, day; NGS, Next-generation sequencing.

| 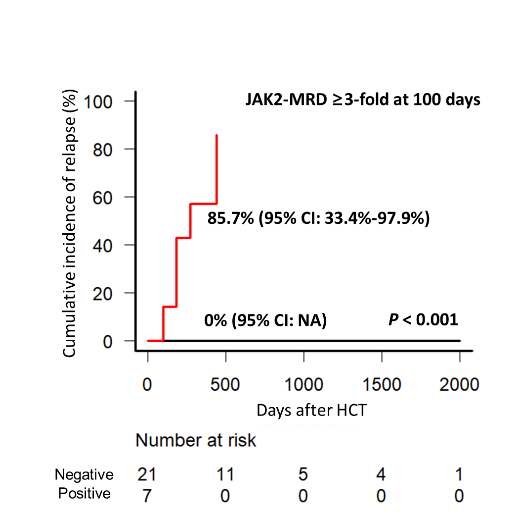A | 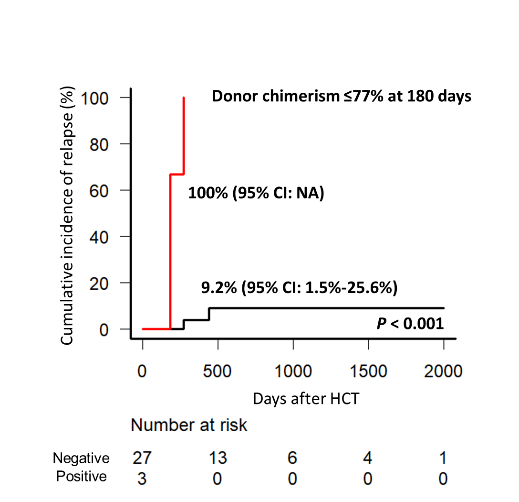B | 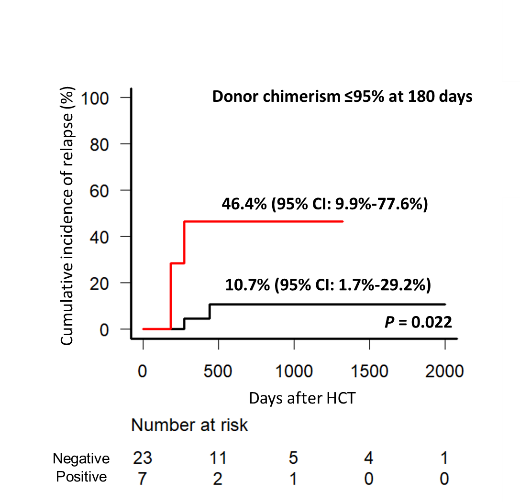C |
| --- | --- | --- |
| D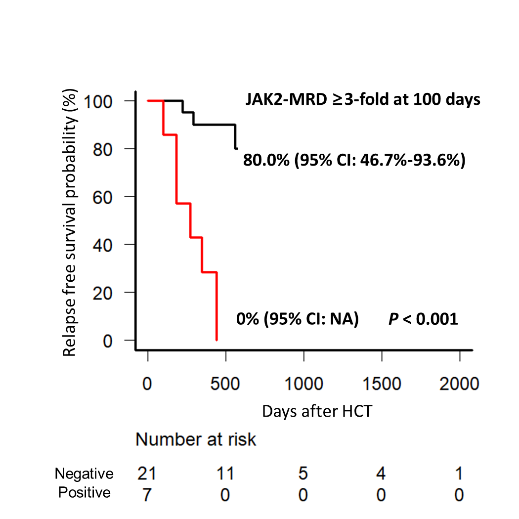 | E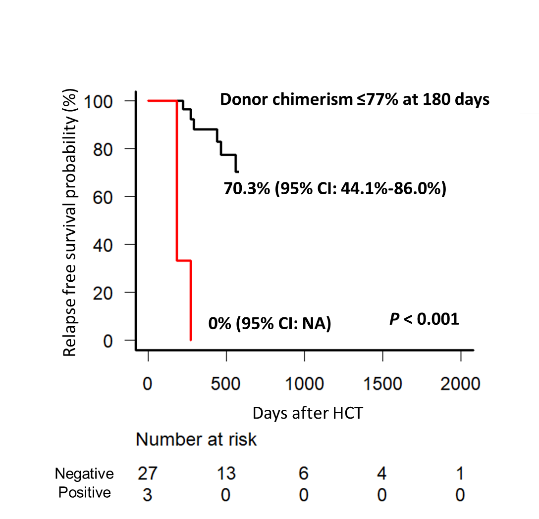 | F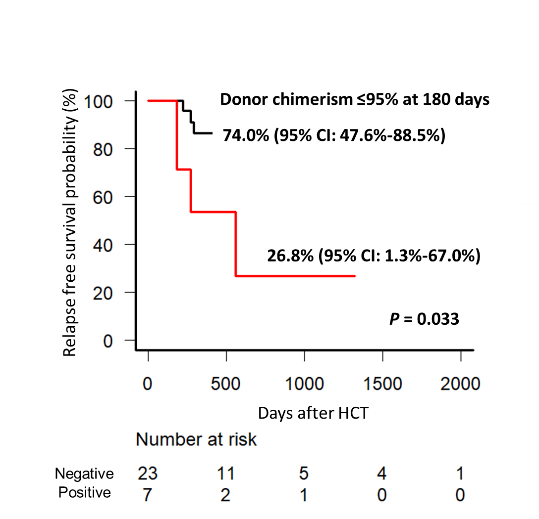 |
| G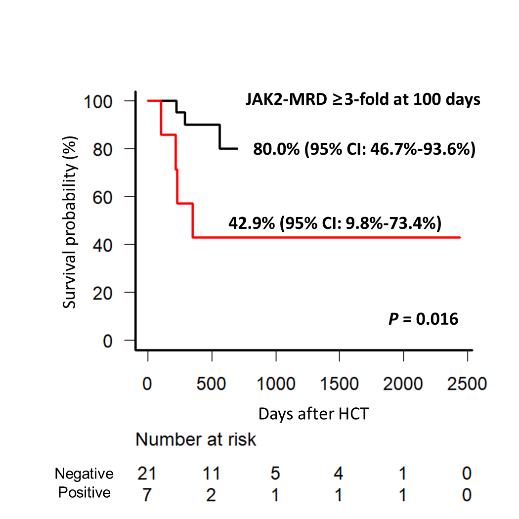 | H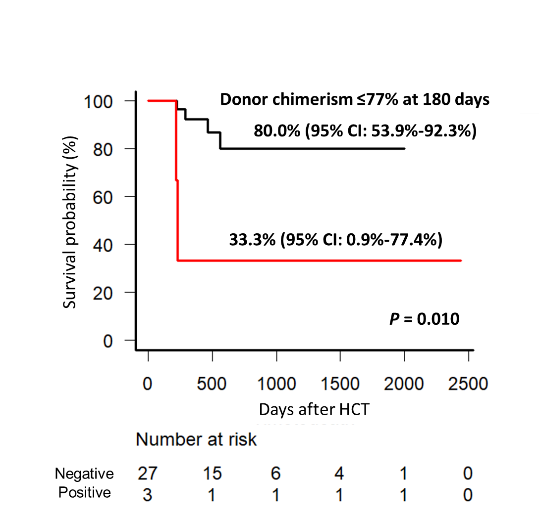 | 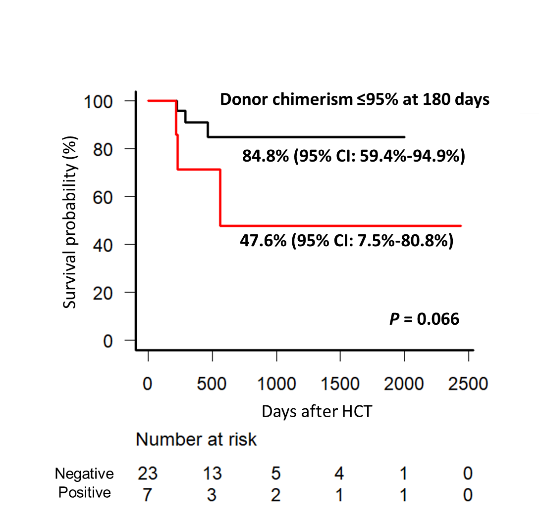  I |

|  |  |  |  |
| --- | --- | --- | --- |
|  |  |  |  |

Supplementary Figure 2. Relapse and probability by *JAK2*-MRD ratio and chimerism. (A) Cumulative relapse incidence for patients with *JAK2*-MRD ratio ≥3-fold at 100 days. (B) Donor chimerism ≤77% at 180 days. (C) Donor chimerism ≤95% at 180 days. (D) Relapse-free survival probability for patients with *JAK2*-MRD ratio ≥3-fold at 100 days. (E) Donor chimerism ≤77% at 180 days. (F) Donor chimerism ≤95% at 180 days. (G) Survival probability for patients with *JAK2*-MRD ratio ≥3-fold at 100 days. (H) Donor chimerism ≤77% at 180 days. (I) Donor chimerism ≤95% at 180 days. Red, positive; black, negative.

Abbreviations: HCT, hematopoietic stem cell transplantation; CI, confidential interval; NA, not available; MRD, measurable residual disease


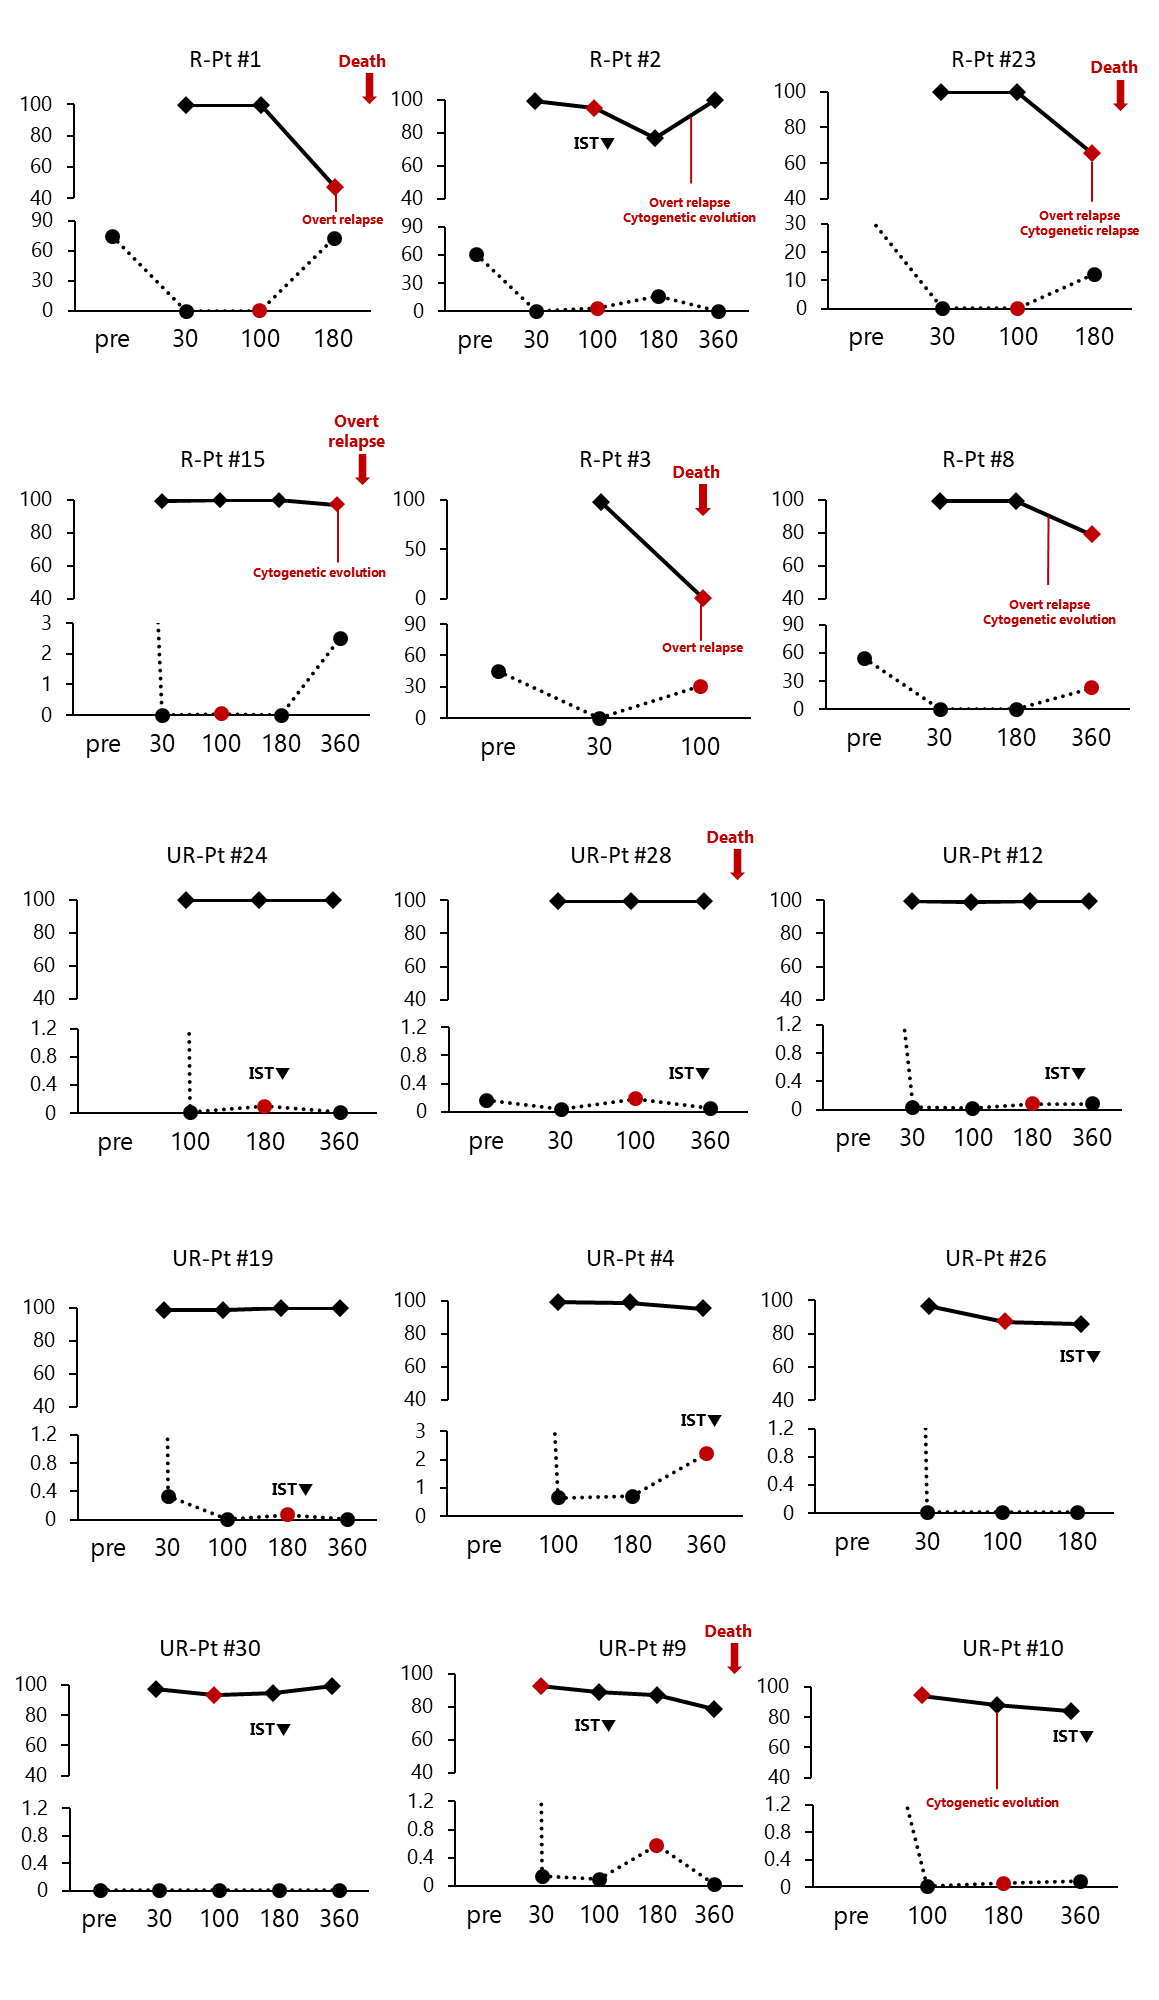


Supplementary Figure 3. Dynamics of *JAK2*-MRD and chimerism. The graphs show the molecular follow-up of 15 patients with emerging relapse evidences; increased *JAK2*-MRD ratio (≥ 3-fold) and/or mixed chimerism (≤95%) marked by red dots. Solid lines and dotted lines display the quantification of donor chimerism (%) and *JAK2*-MRD VAF (%), respectively.

Abbreviations: R-Pt, relapsed patient; UR-Pt, unrelapsed patient; ITS▼, early tapering of immunosuppresive therapy; MRD, measurable residual disease; VAF, variant allele frequency.
